# Supplementary material for: Ultrasensitive humidity sensing and the multifunctional applications of borophene–MoS2 heterostructures
Source: Royal Society of Chemistry journal article supplement (doi:10.1039/d1ta01940f), 2021-01-01
Supplement: d1ta01940f1.pdf [file d1ta01940f1.pdf]

Electronic Supplementary Material (ESI) for Journal of Materials Chemistry A.  
This journal is © The Royal Society of Chemistry 2021

## ***Supplementary Material***

### **Ultrasensitive Humidity Sensing and their Multifunctional Applications of Borophene-MoS<sub>2</sub> Heterostructures**

Chuang Hou, Guoan Tai,\* Yi Liu, Zitong Wu, Zenghui Wu and Xinchao Liang

The State Key Laboratory of Mechanics and Control of Mechanical Structures, Key Laboratory for Intelligent Nano Materials and Devices of Ministry of Education, College of Aerospace Engineering, Nanjing University of Aeronautics and Astronautics, Nanjing 210016, China.

Corresponding author: taiguoan@nuaa.edu.cn

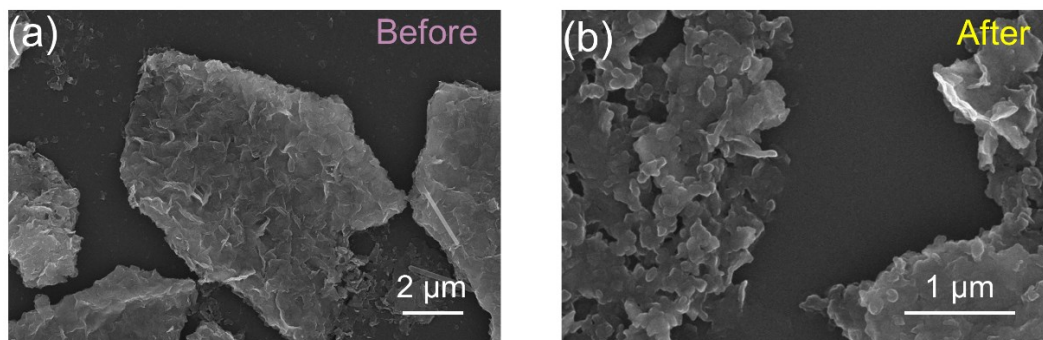

**Fig. S1** SEM images of MoS<sub>2</sub> sheets before and after ultrasound.

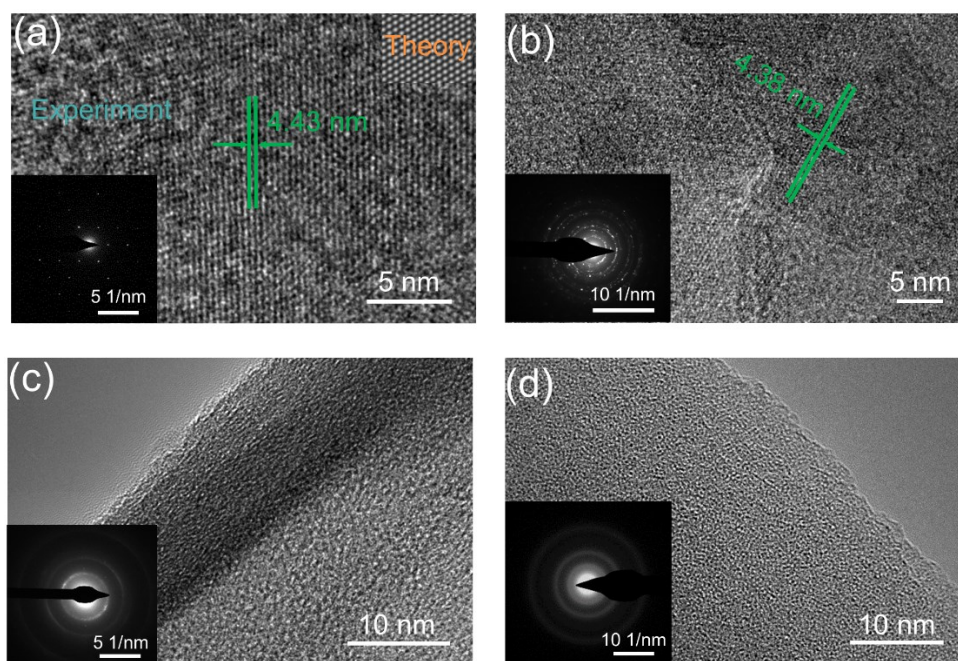

**Fig. S2** HRTEM images and SAED patterns of the borophene sheets at 600 °C for 30 min.

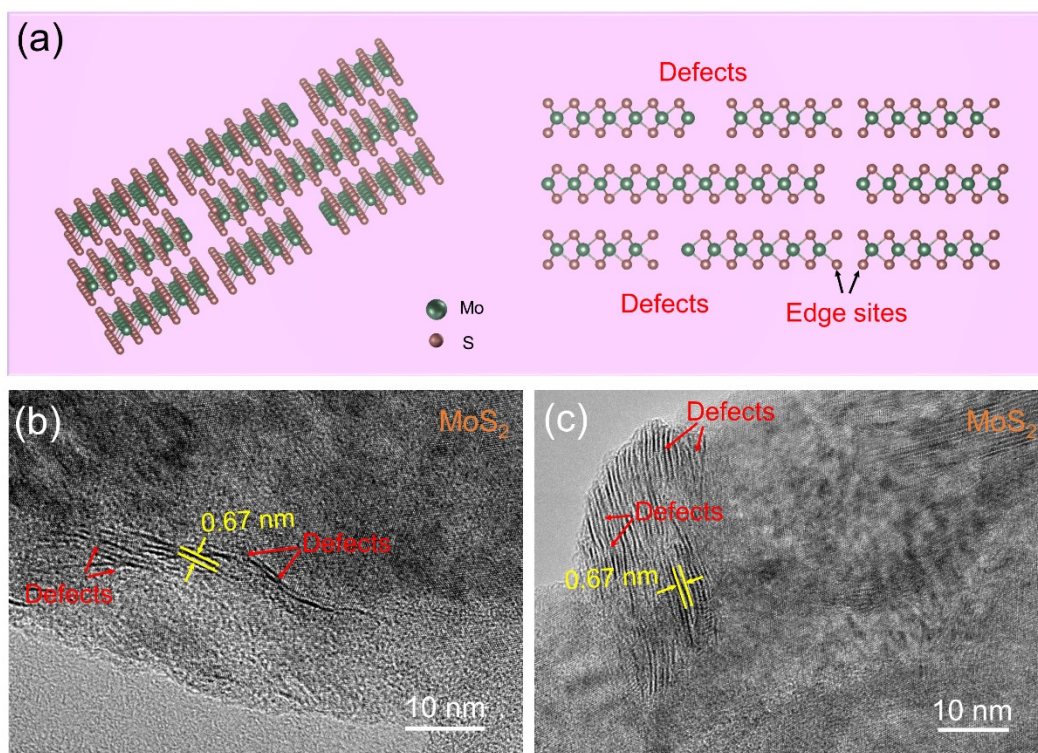

**Fig. S3** HRTEM images of the MoS<sub>2</sub> in borophene-MoS<sub>2</sub> heterostructures. (a) Schematic diagram of defective layered MoS<sub>2</sub>. (b) HRTEM images of the sheets with many defects.

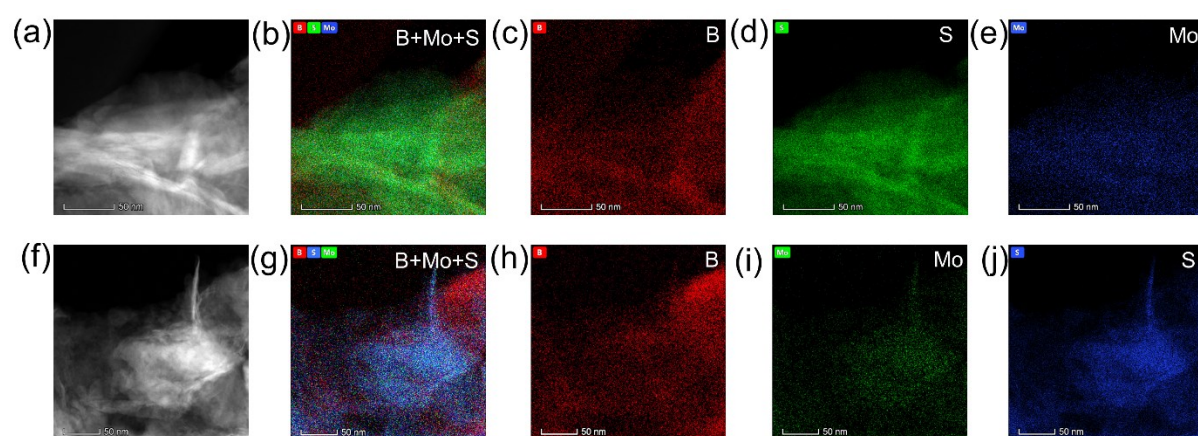

**Fig. S4** HAADF-STEM elemental mappings of the heterostructures in different regions.

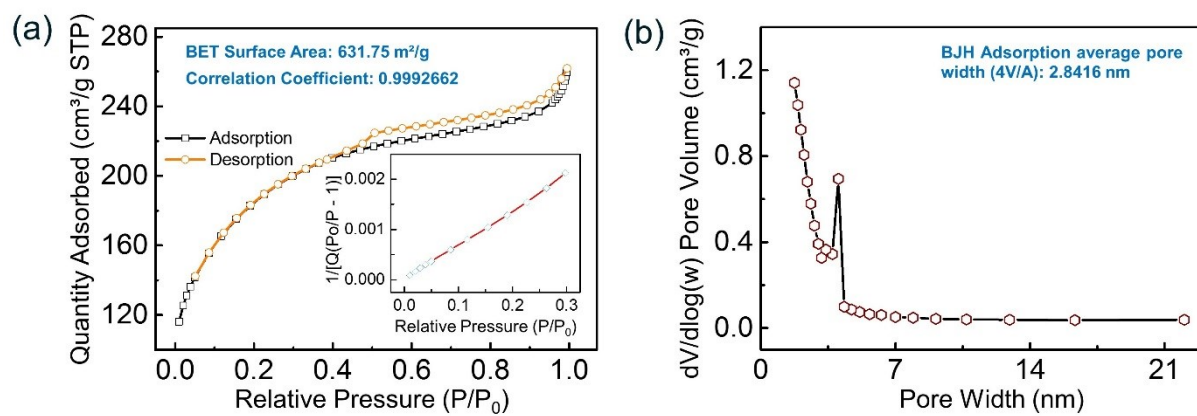

**Fig. S5** N<sub>2</sub> adsorption-desorption characteristics of borophene-MoS<sub>2</sub> heterostructures. (a) N<sub>2</sub> adsorption-desorption isotherm. The inset is the corresponding BET surface area plot. (b) Pore-size distribution curve.



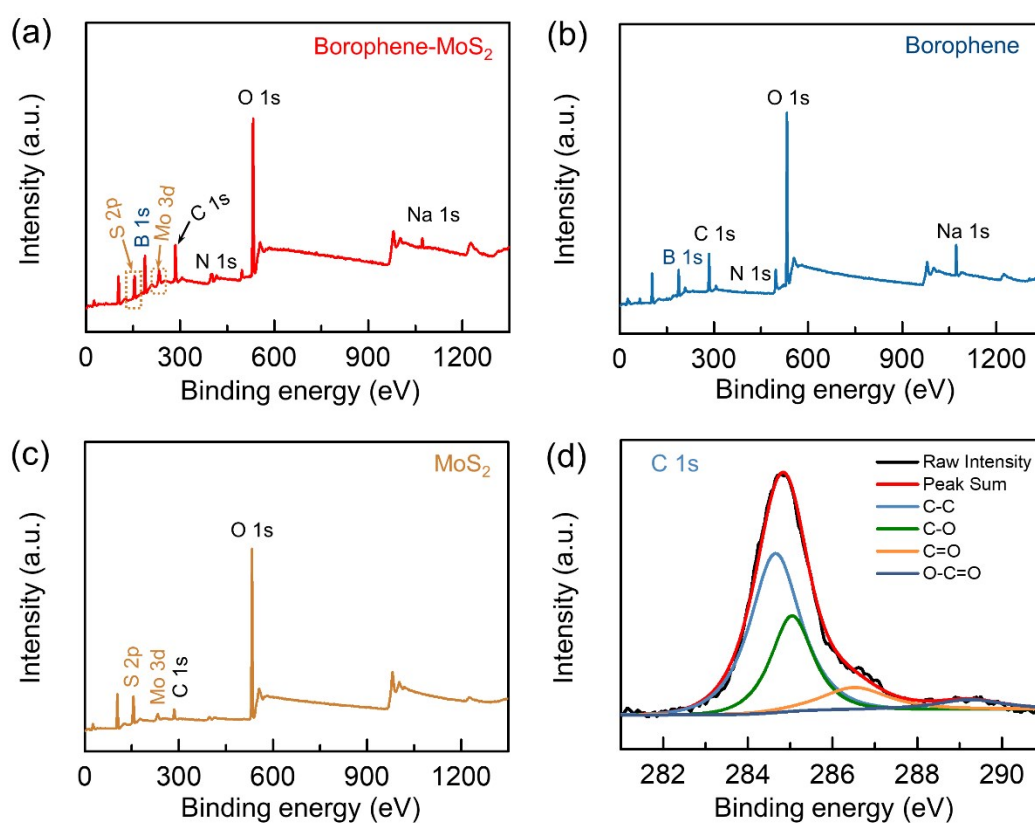

**Fig. S6** XPS spectra of borophene-MoS<sub>2</sub> heterostructures, pristine borophene and MoS<sub>2</sub>. (a) Full-scale XPS survey of borophene-MoS<sub>2</sub> heterostructures. (b) Full-scale XPS survey of borophene. (c) Full-scale XPS survey of MoS<sub>2</sub>. (d) High-resolution C1s spectrum of the heterostructures.

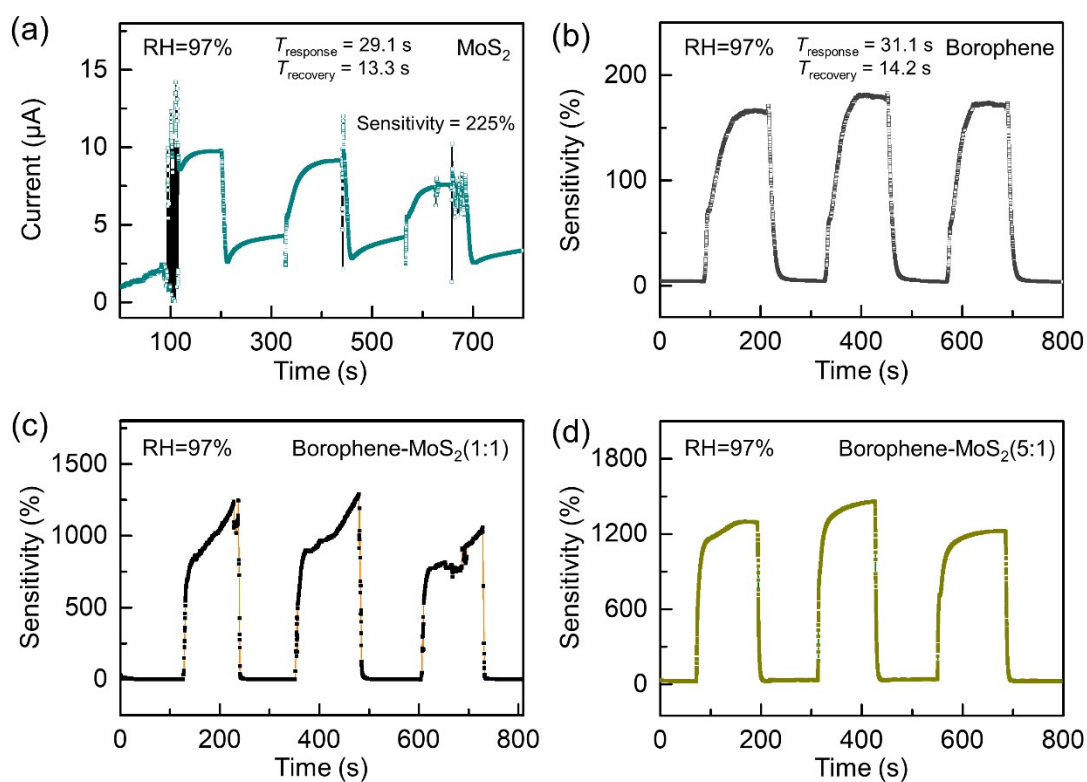

**Fig. S7** Response and recovery curves at 97% RH of the sensors based on difference samples:

(a) MoS<sub>2</sub>, (b) borophene, (c) borophene-MoS<sub>2</sub> (1:1) and (d) borophene-MoS<sub>2</sub> (5:1).



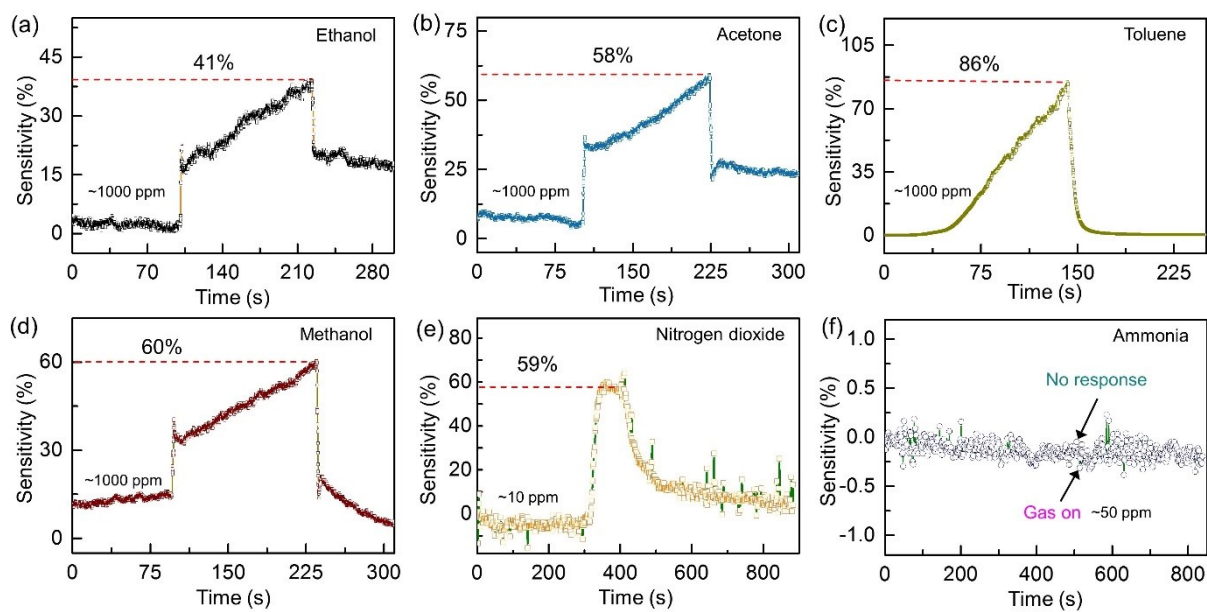

**Fig. S8** Response curves of the heterostructured sensor exposed to organic vapors: (a) ethanol, (b) acetone, (c) toluene, (d) methanol, (e) nitrogen dioxide, and (f) ammonia.

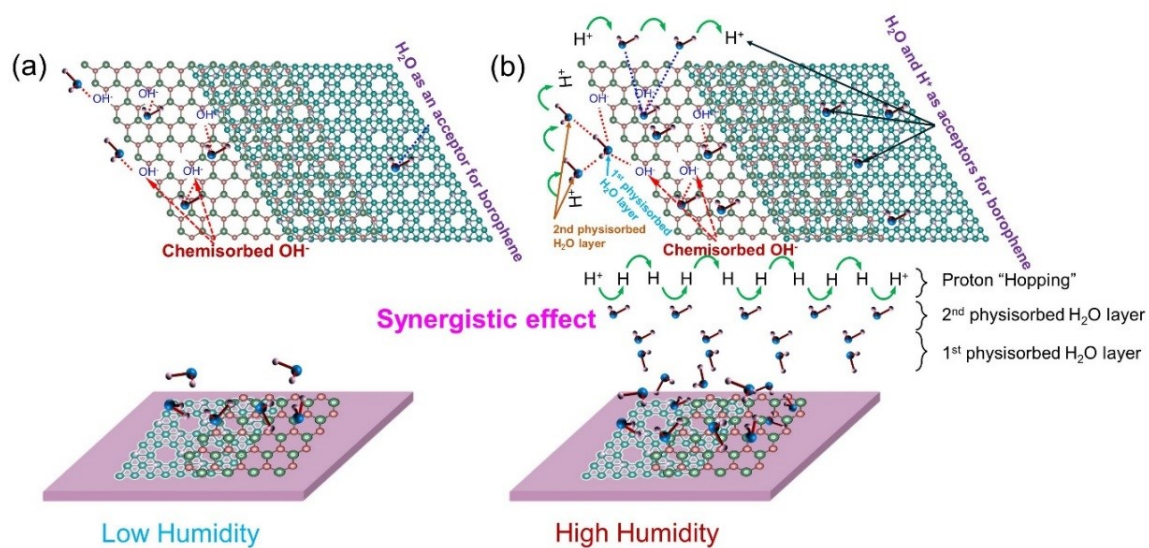

**Fig. S9** Schematic diagram of the humidity sensing mechanism of the borophene-MoS<sub>2</sub> heterostructure-based humidity sensor at various humidities: (a) low humidity and (b) high humidity.

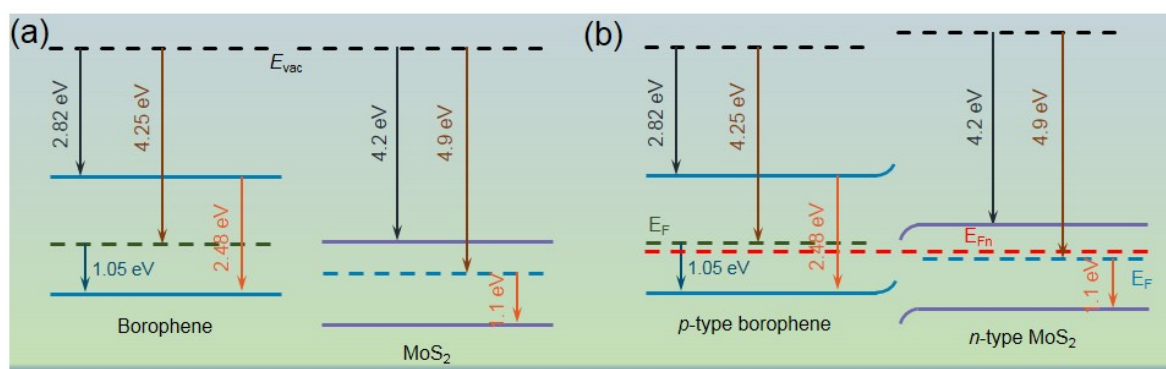

**Fig. S10** Band diagrams of borophene and MoS<sub>2</sub> without (a) and with (b) contact.

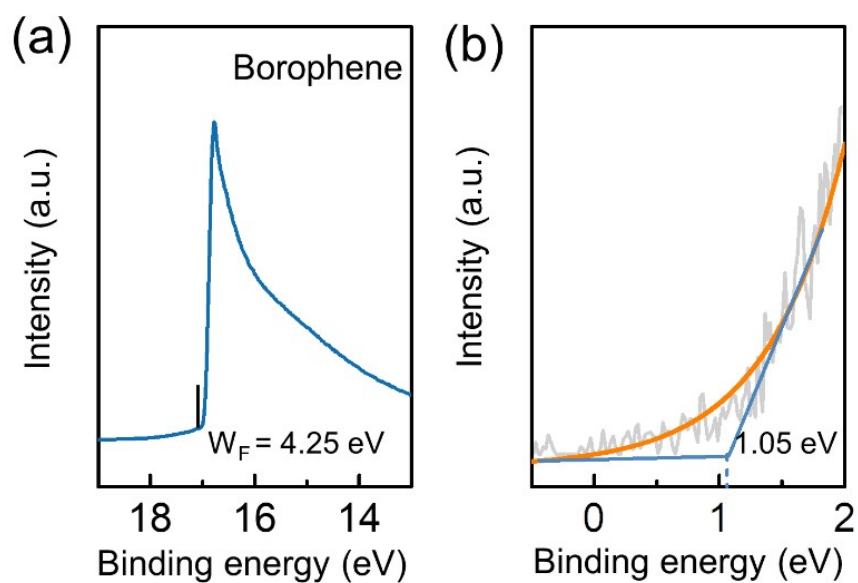

**Fig. S11** UPS spectra of borophene. (a) Photoemission cut-off spectra of  $\alpha'$ -4H-borophene. (b) Valence band (VB) structure of the borophene.

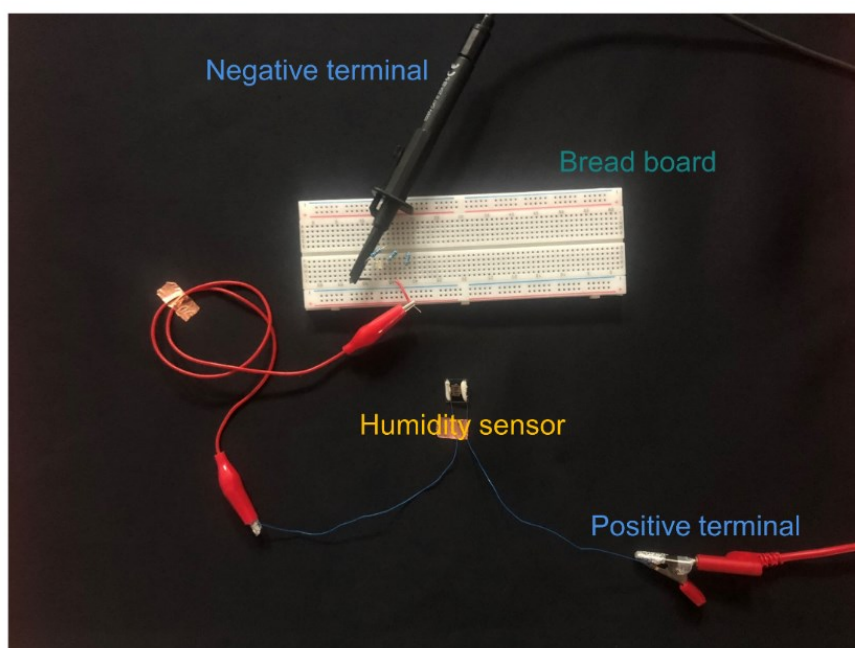

**Fig. S12** Photograph of a non-contact humidity switch system.

### Calculation of theoretical detection limit

The lowest detection limit of relative humidity can not be obtained by our present experimental setup, the theoretical detection limit is derived from the sensor's signal processing performance. The sensor noise can be calculated by the variation in the relative conductance change in the baseline using the root-mean-square deviation (rmsd).<sup>[1-3]</sup> The detailed processes are as follows:

#### Step 1:

We took 10 data points at the baseline in Figure 4b before the exposure of wet vapor.

| Time (s) | Current ( $\mu\text{A}$ ) | $(\Delta I/I)^{1/3} (Y_i)$ |
|----------|---------------------------|----------------------------|
| 0        | 0.02896                   | 0.21492                    |
| 5        | 0.028613                  | -0.135461254               |
| 10       | 0.0289                    | 0.195915425                |
| 15       | 0.02891                   | 0.198897398                |
| 20       | 0.0283                    | 0.198897398                |
| 25       | 0.02876                   | 0.138192309                |
| 30       | 0.02816                   | -0.26341785                |
| 35       | 0.02846                   | -0.198485296               |
| 40       | 0.029                     | 0.222438577                |
| 45       | 0.02878                   | 0.149424758                |

#### Step 2:

After plotting the data, a fifth-order polynomial fit, which gives not only the curve-fitting equation but also the statistical parameters of the polynomial fit, was executed within the data-point range.

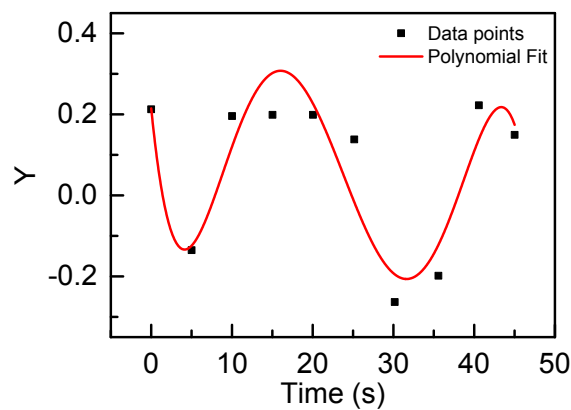

Curve-fitting equation obtained from the fifth order polynomial fit.

#### Step 3:

The  $V_{\chi^2}$  value is then calculated as shown below  $V_{\chi^2} = \sum (Y_i - Y)^2$ , where  $Y_i$  is the measured data point and  $y$  is the corresponding value calculated from the curve-fitting equation.

| Time (s) | Y <sub>i</sub> | Y        | (Y <sub>i</sub> – Y) <sup>2</sup> |
|----------|----------------|----------|-----------------------------------|
| 0        | 0.21492        | 0.26773  | 0.002788896                       |
| 5        | -0.135461254   | -0.12426 | 0.000125468                       |
| 10       | 0.195915425    | 0.11984  | 0.00578747                        |
| 15       | 0.198897398    | 0.30185  | 0.010599238                       |
| 20       | 0.198897398    | 0.22761  | 0.000824414                       |
| 25       | 0.138192309    | -0.00954 | 0.021824835                       |
| 30       | -0.26341785    | -0.19248 | 0.005032179                       |
| 35       | -0.198485296   | -0.14399 | 0.002969737                       |
| 40       | 0.222438577    | 0.10947  | 0.012761899                       |
| 45       | 0.149424758    | 0.17411  | 0.000609361                       |

#### Step 4:

$\text{rms}_{\text{noise}} = \sqrt{(V\chi^2 / N)}$  where, N = 10

$\text{rms}_{\text{noise}} = 0.079576063$

Detection limit: DL (%) = 3 \* ( $\text{rms}_{\text{noise}}$  / slope) = 3 \* (0.079576063/0.2452) (Slope = 0.2452, the value obtained from Fig. 4c in the text, inset) = 0.9736%

So, the theoretical detection limit calculated is 0.9736%.

#### References

- [1] J. Li, Y. Lu, Q. Ye, M. Cinke, J. Han and M. Meyyappan, *Nano Lett.*, 2003, **3**, 929-933.
- [2] V. Dua, S. P. Surwade, S. Ammu, S. R. Agnihotra, S. Jain, K. E. Roberts, S. Park, R. S. Ruoff and S. K. Manohar, *Angew. Chem., Int. Ed.*, 2010, **49**, 2154-2157.
- [3] Y. H. Kim, S. J. Kim, Y.-J. Kim, Y.-S. Shim, S. Y. Kim, B. H. Hong and H. W. Jang, *ACS Nano*, 2015, **9**, 10453-10460.
